# Supplementary material
Source: PubMed Central journal article supplement (PMC6048537)
Supplement: pnas.1720113115.sapp.pdf [file pnas.1720113115.sapp.pdf]

# Supporting Information

## Supplemental Figures

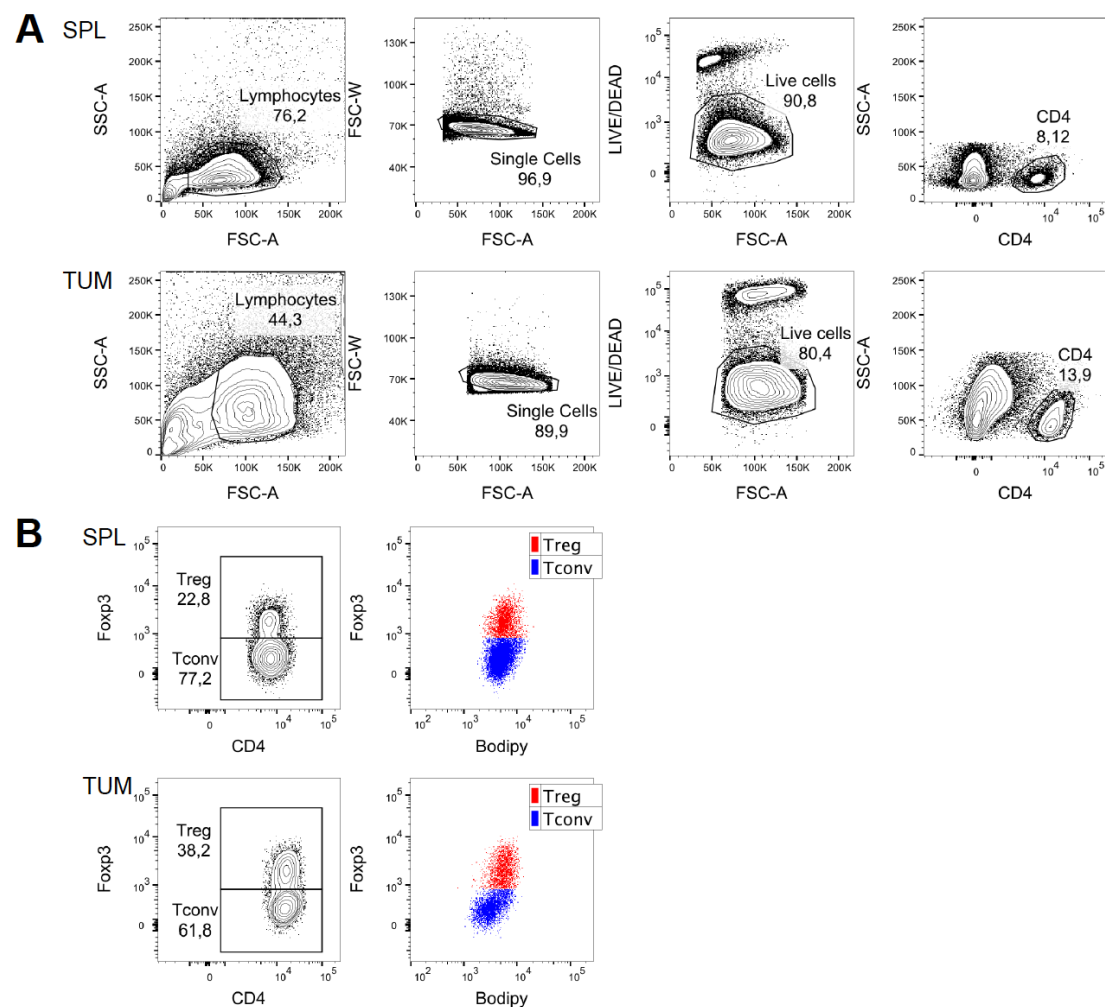

Figure S1. Gating strategy for Treg/Tconv identification in SPL and TUM by flow cytometry.

Flow cytometry analysis was performed on lymphocytes extracted from single spleens (SPL) and tumors (TUM) from C57BL/6 mice bearing MCA38 nodules. **(A)** Sequential hierarchical gating strategy for the selection of CD4 T cells. **(B)** In gated CD4 T cells, Tregs and Tconvs were selected according to Fop3 intracellular expression. *Right*, Bodipy levels in overlaid Treg/Tconv subsets.

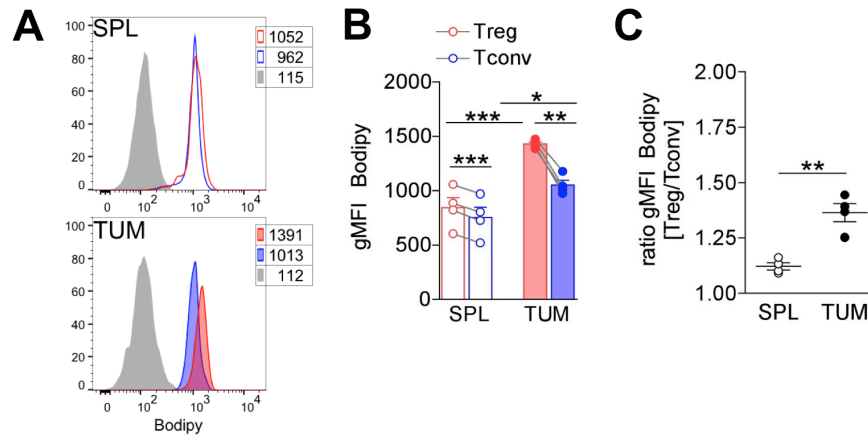

*Figure S2. Tumor-infiltrating Tregs accumulate intracellular lipids also in another tumor model (B16F10).*

$10^5$  B16F10 cells were injected s.c. into C57BL/6 mice, and flow cytometry analysis was performed on lymphocytes extracted from spleen (SPL) and tumor (TUM) after 14 days. **(A)** Representative histograms and **(B)** geometric mean fluorescence intensity (gMFI) analysis of Bodipy staining in gated CD25+Foxp3+ Tregs (red) and CD25-Foxp3- Tconvs (blue) in SPL (empty peaks and bars) and TUM (solid peaks and bars) from tumor-bearing mice. Peaks in grey represent the fluorescence-minus-one (FMO) controls. **(C)** Ratio between Bodipy gMFI in Tregs and Tconvs from SPL and TUM. Error bars show mean  $\pm$  SEM, each dot corresponds to a single mouse. Data shown are from a representative out of two independent experiments. \* $p < 0.05$ , \*\* $p < 0.01$ , by Student t test, paired between Tregs and Tconvs in the same samples; unpaired, between populations of different samples.

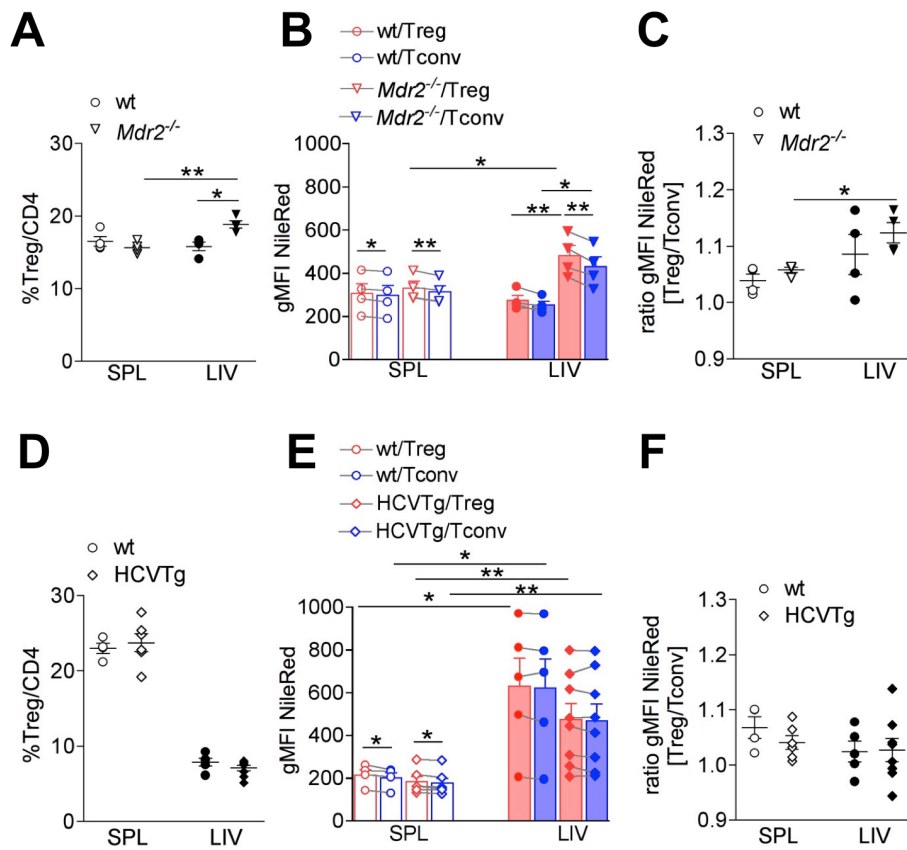

**Figure S3. High intracellular lipid accumulation occurs in expanding Tregs also in the inflamed hepatic microenvironment.**

**(A-C)** Analysis of CD25<sup>+</sup>Foxp3<sup>+</sup> Tregs and CD25<sup>-</sup>Foxp3<sup>-</sup> Tconvs from spleen (SPL) and liver (LIV) of wild type (wt) and *Mdr2*<sup>-/-</sup> mice. **(A)** Frequency of Tregs in gated CD4<sup>+</sup> lymphocytes from the indicated samples. **(B)** Geometric mean fluorescence intensity (gMFI) of Nile Red staining in Tregs (red) and Tconvs (blue) from spleen (empty bars) and liver (filled bars) of wt and *Mdr2*<sup>-/-</sup> mice. **(C)** Ratio between Nile Red gMFI in Tregs and Tconvs in spleen and liver of wt and *Mdr2*<sup>-/-</sup> mice.

**(D-F)** Analysis of CD25<sup>+</sup>Foxp3<sup>+</sup> Tregs and CD25<sup>-</sup>Foxp3<sup>-</sup> Tconvs from spleen (SPL) and liver (LIV) of wild type (wt) and HCV transgenic (HCVTg) mice. **(D)** Frequency of Tregs in gated CD4<sup>+</sup> lymphocytes from the indicated samples. **(E)** gMFI of Nile Red staining in Tregs (red) and Tconvs (blue) from spleen (empty bars) and liver (filled bars) of wt and HCVTg mice. **(F)** Ratio between Nile Red gMFI of Tregs and Tconvs in spleen and liver of wt and HCVTg mice.

Error bars show mean  $\pm$  SEM, \* $p < 0.05$ , \*\* $p < 0.01$ , by Student t test, paired between Tregs and Tconvs in the same sample; unpaired, between populations of different samples. Each dot corresponds to a single mouse; data shown are from a representative out of two independent experiments.

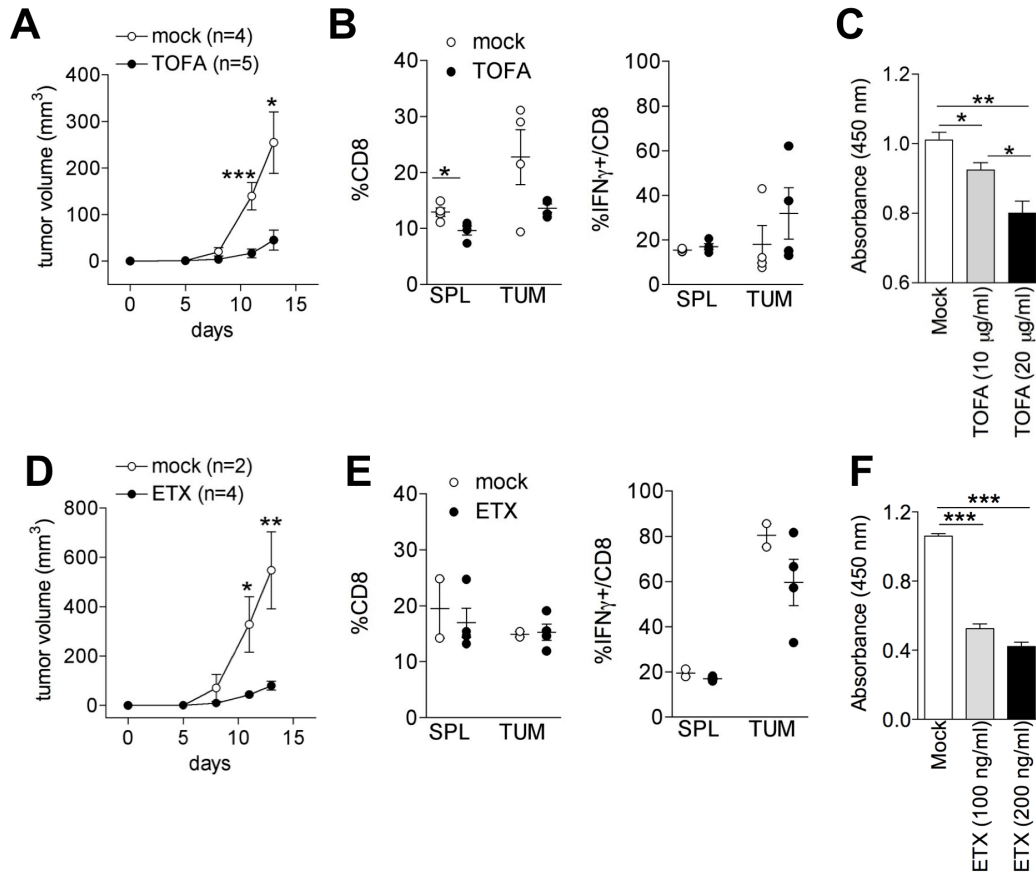

Figure S4. TOFA and Etx treatments mostly target tumor cells.

(A, D) Tumor-bearing mice were treated with repeated intra-tumor (i.t.) TOFA (A) or Etx (D) injections at days 5, 8, 11, 13 after MCA38 s.c. transplantation, and tumor growth was monitored. (B, E) At day 14, spleen (SPL) and tumors (TUM) were collected and tumor-infiltrating CD8 T cells characterization was performed, in terms of frequency (left panels) and IFN $\gamma$  production (right panels). Data are shown as mean  $\pm$  SEM, 2-5 mice were included in each experimental group; \*p < 0.05, \*\*p < 0.01, \*\*\*p < 0.005, by Student t test, unpaired.

(C, F) MCA38 cells were cultured in vitro with the indicated TOFA (C) or Etx (F) concentrations, and XTT cytotoxicity assay was performed after 24 hours. Error bars show mean  $\pm$  SEM, data shown are representative of one out of two independent experiments. \*p < 0.05, \*\*p < 0.01, \*\*\*p < 0.005, by Student t test, unpaired.

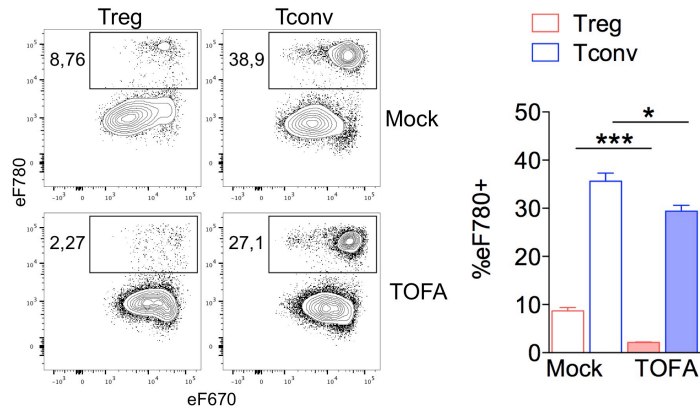

*Figure S5. TOFA exposure increases Tconv and Treg survival in vitro.*

Magnetically purified Tregs and Tconvs were labelled with eFluor670 and co-cultured at 1:1 ratio with feeder cells, anti-CD3 and IL-2, with or without TOFA (5  $\mu$ g/ml). After 4 days, cells were stained with the viability dye eFluor780, Bodipy, CD4 and Foxp3, and flow cytometry analysis was performed in gated Tregs (CD4+Foxp3+, red) or Tconvs (CD4+Foxp3-, blue). Numbers indicate the frequency of dead cells, evaluated as the percentage of cells labelled with the viability dye eFluor780 in each gate.

Each condition was tested in triplicates; data shown are from a representative out of two independent experiments. Error bars show mean  $\pm$  SEM, \* $p$  < 0.05, \*\*\* $p$  < 0.005, by Student t test, unpaired.

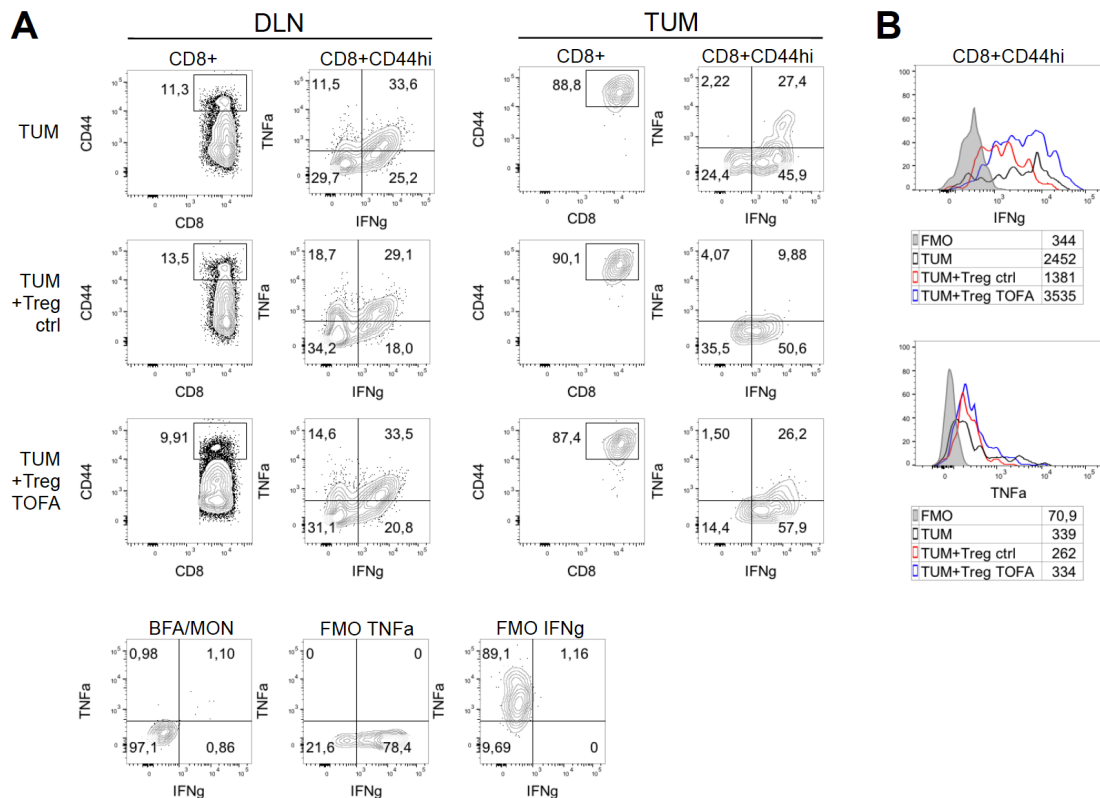

*Figure S6. TOFA-treated Tregs may display lower suppressive activity against anti-tumor concomitant immunity in vivo.*

Tregs were isolated through immunomagnetic separation from the spleens of naïve mice, cultured in vitro 40 hours with aCD3/IL-2, in the presence of TOFA or DMSO (ctrl). Then, Tregs were co-injected at 1:1 ratio with  $10^5$  MCA38 tumor cells, subcutaneously in the left flank of mice already bearing palpable MCA38-tumors on the right flank (10 days after the primary tumor inoculation); as control, tumor cells only (TUM) were injected. After further 13 days, flow cytometry analysis was performed in lymphocytes extracted from secondary tumor-draining lymph nodes (DLN) and the growing secondary tumors (2 in the group TUM, 2 in the group TUM+Treg TOFA, and only 1 in the TUM+Treg ctrl). **(A)** Contour plots showing the frequency of CD44hi in gated CD8 T cells, and of TNF $\alpha$ +/IFN $\gamma$ + in gated CD8+CD44hi T cells, in DLN and TUM in each experimental group. Samples in the bottom line show the staining controls on CD8+CD44hi splenocytes; FMO, fluorescence-minus-one; BFA/MON, cultured with BFA/MON only in the absence of PMA/ionomycin. **(B)** Histogram overlay of IFN $\gamma$  and TNF $\alpha$  in TUM-infiltrating gated CD8+CD44hi in the indicated groups; numbers indicate the geometric mean fluorescence intensity (gMFI).

**A**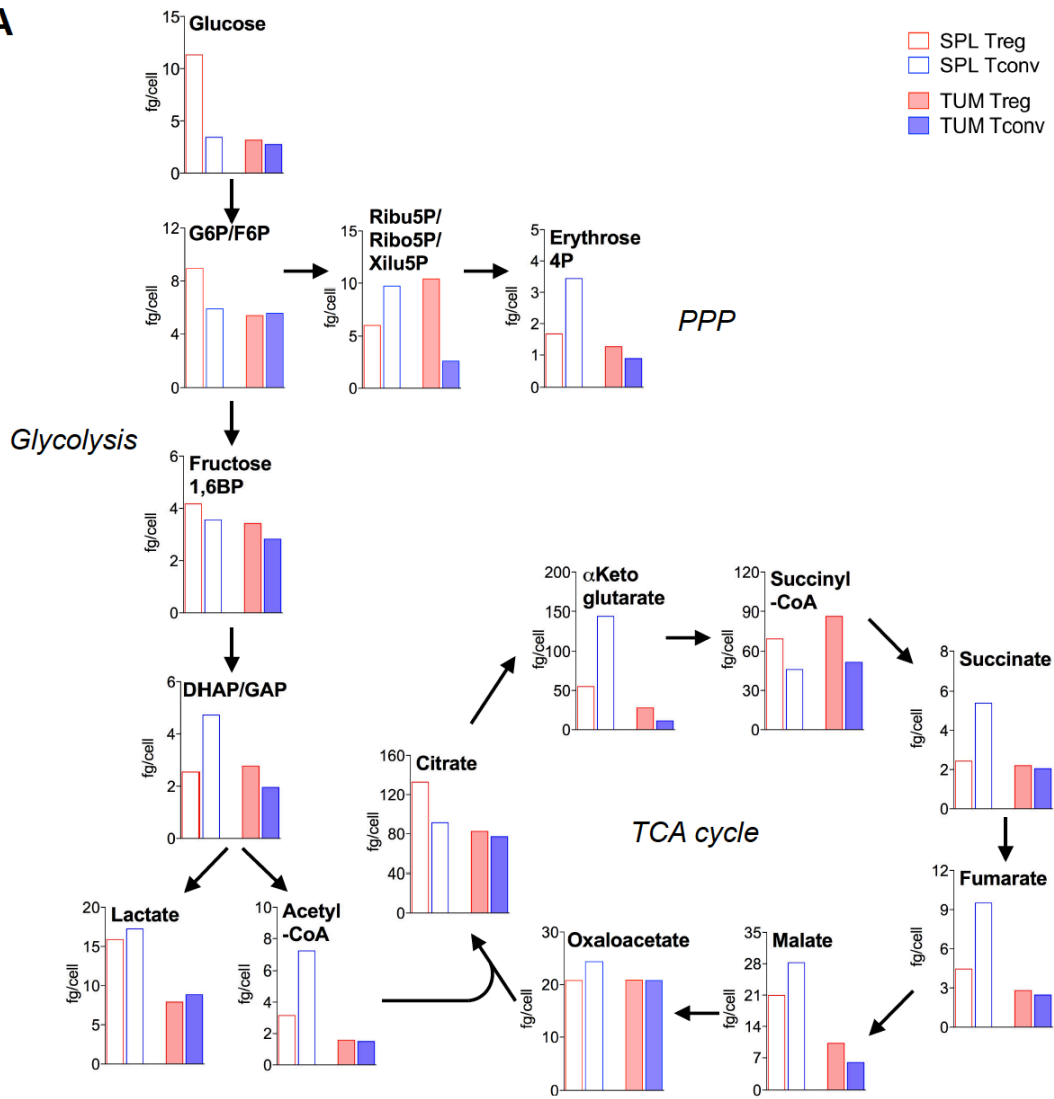

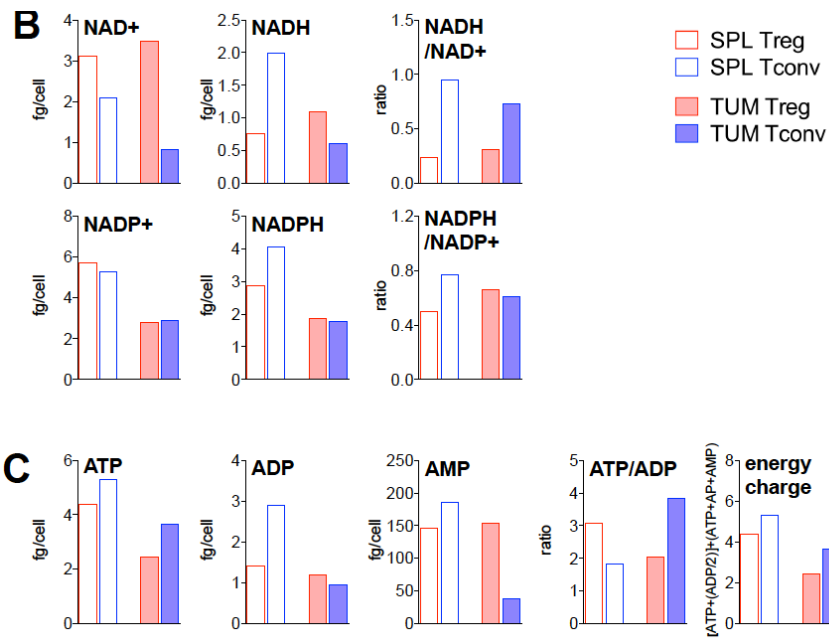

*Figure S7. Metabolomic profile of Tregs and Tconvs freshly extracted from tumor and spleens.*

CD4+CD25+ Tregs and CD4+CD25- Tconvs were magnetically purified from pooled spleens and tumors of tumor-bearing mice, and metabolomic profiling was performed directly ex vivo. **(A)** Diagram showing the levels of each metabolite in the context of glycolysis, pentose-phosphate, and TCA cycle pathways. **(B-C)** Levels of analytes and parameters, indicating the redox and energy status in each condition.



**Table S1**

List of the 216 genes found upregulated >2 fold only in Treg CT OX40+ versus Treg PB OX40-, and not in all the other cell subsets analyzed (Treg CT OX40-, Treg PB OX40+ and all Tconv counterparts).

|    | RefSeq Gene    | Gene Symbol | Gene description                                                                 |
|----|----------------|-------------|----------------------------------------------------------------------------------|
| 1  | Hs.413494      |             |                                                                                  |
| 2  | Hs.534439      |             |                                                                                  |
| 3  | Hs.554324      |             |                                                                                  |
| 4  | Hs.564874      |             |                                                                                  |
| 5  | Hs.571502      |             |                                                                                  |
| 6  | NM_000093.2    | COL5A1      | collagen type V alpha 1 chain                                                    |
| 7  | NM_000130.2    | F5          | coagulation factor V (proaccelerin, labile factor)                               |
| 8  | NM_000169.1    | GLA         | galactosidase, alpha                                                             |
| 9  | NM_000211.1    | ITGB2       | integrin, beta 2                                                                 |
| 10 | NM_000259.1    | MYO5A       | myosin VA (heavy chain 12, myosin)                                               |
| 11 | NM_000310.2    | PPT1        | palmitoyl-protein thioesterase 1                                                 |
| 12 | NM_000365.4    | TPI1        | triosephosphate isomerase 1                                                      |
| 13 | NM_000474.3    | TWIST1      | twist family bHLH transcription factor 1                                         |
| 14 | NM_000521.2    | HEXB        | hexosaminidase B                                                                 |
| 15 | NM_000595.2    | LTA         | lymphotoxin alpha (TNF superfamily, member 1)                                    |
| 16 | NM_000616.2    | CD4         | CD4 molecule                                                                     |
| 17 | NM_000675.3    | ADORA2A     | adenosine A2a receptor                                                           |
| 18 | NM_000877.2    | IL1R1       | interleukin 1 receptor, type I                                                   |
| 19 | NM_001001870.1 | C17orf91    | chromosome 17 open reading frame 91                                              |
| 20 | NM_001017980.1 | LOC203547   | hypothetical protein LOC203547                                                   |
| 21 | NM_001024912.1 | CEACAM1     | carcinoembryonic antigen-related cell adhesion molecule 1 (biliary glycoprotein) |
| 22 | NM_001033046.1 | C17orf62    | chromosome 17 open reading frame 62                                              |
| 23 | NM_001039933.1 | CD79B       | CD79b molecule                                                                   |
| 24 | NM_001040168.1 | LFNG        | LFNG O-fucosylpeptide 3-beta-N-acetylglucosaminyltransferase                     |
| 25 | NM_001066.2    | TNFRSF1B    | tumor necrosis factor receptor superfamily member 1B (TNFR2)                     |
| 26 | NM_001130677.1 | C17ORF96    | chromosome 17 open reading frame 96                                              |
| 27 | NM_001183.3    | ATP6AP1     | ATPase, H <sup>+</sup> transporting, lysosomal accessory protein 1               |
| 28 | NM_001252.2    | TNFSF7      | tumor necrosis factor (ligand) superfamily, member 7 (CD70)                      |
| 29 | NM_001288.4    | CLIC1       | chloride intracellular channel 1                                                 |
| 30 | NM_001386.4    | DPYSL2      | dihydropyrimidinase-like 2                                                       |
| 31 | NM_001398.2    | ECH1        | enoyl-CoA hydratase 1, peroxisomal                                               |
| 32 | NM_001418.3    | EIF4G2      | eukaryotic translation initiation factor 4 gamma, 2                              |
| 33 | NM_001428.2    | ENO1        | enolase 1, (alpha)                                                               |
| 34 | NM_001559.2    | IL12RB2     | interleukin 12 receptor subunit beta 2                                           |
| 35 | NM_001611.2    | ACP5        | acid phosphatase 5, tartrate resistant                                           |
| 36 | NM_001613.1    | ACTA2       | actin, alpha 2, smooth muscle, aorta                                             |
| 37 | NM_001615.3    | ACTG2       | actin, gamma 2, smooth muscle, enteric                                           |
| 38 | NM_001618.2    | PARP1       | poly (ADP-ribose) polymerase family, member 1                                    |
| 39 | NM_001659.1    | ARF3        | ADP-ribosylation factor 3                                                        |
| 40 | NM_001693.2    | ATP6V1B2    | ATPase, H <sup>+</sup> transporting, lysosomal 56/58kDa, V1 subunit B, isoform 2 |
| 41 | NM_001759.2    | CCND2       | cyclin D2                                                                        |
| 42 | NM_001767.2    | CD2         | CD2 molecule                                                                     |
| 43 | NM_001776.3    | ENTPD1      | ectonucleoside triphosphate diphosphohydrolase 1 (CD39)                          |
| 44 | NM_001779.1    | CD58        | CD58 molecule                                                                    |
| 45 | NM_001780.3    | CD63        | CD63 antigen (melanoma 1 antigen)                                                |

|    |             |          |                                                                                         |
|----|-------------|----------|-----------------------------------------------------------------------------------------|
| 46 | NM_001814.2 | CTSC     | cathepsin C                                                                             |
| 47 | NM_001852.3 | COL9A2   | collagen, type IX, alpha 2                                                              |
| 48 | NM_001903.2 | CTNNA1   | catenin (cadherin-associated protein), alpha 1, 102kDa                                  |
| 49 | NM_001979.4 | EPHX2    | epoxide hydrolase 2, cytoplasmic                                                        |
| 50 | NM_002046.2 | GAPDH    | glyceraldehyde-3-phosphate dehydrogenase                                                |
| 51 | NM_002064.1 | GLRX     | glutaredoxin (thioltransferase)                                                         |
| 52 | NM_002076.2 | GNS      | glucosamine (N-acetyl)-6-sulfatase (Sanfilippo disease IIID)                            |
| 53 | NM_002080.2 | GOT2     | glutamic-oxaloacetic transaminase 2                                                     |
| 54 | NM_002125.3 | HLA-DRB5 | major histocompatibility complex, class II, DR beta 5                                   |
| 55 | NM_002167.2 | ID3      | inhibitor of DNA binding 3, dominant negative helix-loop-helix protein                  |
| 56 | NM_002194.2 | INPP1    | inositol polyphosphate-1-phosphatase                                                    |
| 57 | NM_002284.3 | KRT86    | keratin 86, type II                                                                     |
| 58 | NM_002298.2 | LCP1     | lymphocyte cytosolic protein 1 (L-plastin)                                              |
| 59 | NM_002305.2 | LGALS1   | lectin, galactoside-binding, soluble, 1 (galectin 1)                                    |
| 60 | NM_002351.1 | SH2D1A   | SH2 domain protein 1A, Duncan's disease (lymphoproliferative syndrome)                  |
| 61 | NM_002413.3 | MGST2    | microsomal glutathione S-transferase 2                                                  |
| 62 | NM_002460.1 | IRF4     | interferon regulatory factor 4                                                          |
| 63 | NM_002475.2 | MLC1SA   | myosin light chain 1 slow a                                                             |
| 64 | NM_002525.1 | NRD1     | nardilysin (N-arginine dibasic convertase)                                              |
| 65 | NM_002654.3 | PKM2     | pyruvate kinase, muscle                                                                 |
| 66 | NM_002674.2 | PMCH     | pro-melanin concentrating hormone                                                       |
| 67 | NM_002708.3 | PPP1CA   | protein phosphatase 1, catalytic subunit, alpha isozyme                                 |
| 68 | NM_002748.2 | MAPK6    | mitogen-activated protein kinase 6                                                      |
| 69 | NM_002790.2 | PSMA5    | proteasome (prosome, macropain) subunit, alpha type, 5                                  |
| 70 | NM_002818.2 | PSME2    | proteasome activator subunit 2                                                          |
| 71 | NM_002872.3 | RAC2     | ras-related C3 botulinum toxin substrate 2 (rho family, small GTP binding protein Rac2) |
| 72 | NM_002922.3 | RGS1     | regulator of G-protein signaling 1                                                      |
| 73 | NM_002999.2 | SDC4     | syndecan 4                                                                              |
| 74 | NM_003234.1 | TFRC     | transferrin receptor (p90, CD71)                                                        |
| 75 | NM_003355.2 | UCP2     | uncoupling protein 2 (mitochondrial, proton carrier)                                    |
| 76 | NM_003365.2 | UQCRC1   | ubiquinol-cytochrome c reductase core protein I                                         |
| 77 | NM_003650.2 | CST7     | cystatin F (leukocystatin)                                                              |
| 78 | NM_003656.3 | CAMK1    | Calcium/calmodulin-dependent protein kinase I                                           |
| 79 | NM_003689.2 | AKR7A2   | aldo-keto reductase family 7, member A2 (aflatoxin aldehyde reductase)                  |
| 80 | NM_003745.1 | SOCS1    | suppressor of cytokine signaling 1                                                      |
| 81 | NM_003746.1 | DNCL1    | dynein, cytoplasmic, light polypeptide 1                                                |
| 82 | NM_003805.3 | CRADD    | CASP2 and RIPK1 domain containing adaptor with death domain                             |
| 83 | NM_003855.2 | IL18R1   | interleukin 18 receptor 1                                                               |
| 84 | NM_003884.4 | KAT2B    | K(lysine) acetyltransferase 2B                                                          |
| 85 | NM_003975.2 | SH2D2A   | SH2 domain protein 2A                                                                   |
| 86 | NM_003978.2 | PSTPIP1  | proline-serine-threonine phosphatase interacting protein 1                              |
| 87 | NM_004036.2 | ADCY3    | adenylate cyclase 3                                                                     |
| 88 | NM_004040.2 | RHOB     | ras homolog family member B                                                             |
| 89 | NM_004120.3 | GBP2     | guanylate binding protein 2, interferon-inducible                                       |
| 90 | NM_004124.2 | GMFB     | glia maturation factor, beta                                                            |
| 91 | NM_004225.1 | MFHAS1   | malignant fibrous histiocytoma amplified sequence 1                                     |
| 92 | NM_004251.3 | RAB9A    | RAB9A, member RAS oncogene family                                                       |
| 93 | NM_004355.2 | CD74     | CD74 molecule, major histocompatibility complex, class II invariant chain               |
| 94 | NM_004364.2 | CEBPA    | CCAAT/enhancer binding protein (C/EBP), alpha                                           |
| 95 | NM_004642.2 | CDK2AP1  | cyclin-dependent kinase 2 associated protein 1                                          |
| 96 | NM_004910.1 | PITPNM1  | phosphatidylinositol transfer protein, membrane-associated                              |

|     |             |          |                                                                                     |
|-----|-------------|----------|-------------------------------------------------------------------------------------|
|     |             |          | 1                                                                                   |
| 97  | NM_004926.2 | ZFP36L1  | zinc finger protein 36, C3H type-like 1                                             |
| 98  | NM_005063.4 | SCD      | stearoyl-CoA desaturase (delta-9-desaturase)                                        |
| 99  | NM_005177.2 | ATP6V0A1 | ATPase, H <sup>+</sup> transporting, lysosomal V0 subunit a isoform 1               |
| 100 | NM_005348.2 | HSP90AA1 | heat shock protein 90kDa alpha (cytosolic), class A member 1                        |
| 101 | NM_005384.2 | NFIL3    | nuclear factor, interleukin 3 regulated                                             |
| 102 | NM_005415.3 | SLC20A1  | solute carrier family 20 (phosphate transporter), member 1                          |
| 103 | NM_005436.2 | CCDC6    | coiled-coil domain containing 6                                                     |
| 104 | NM_005532.3 | IFI27    | interferon, alpha-inducible protein 27                                              |
| 105 | NM_005533.2 | IFI35    | interferon-induced protein 35                                                       |
| 106 | NM_005755.2 | EBI3     | Epstein-Barr virus induced 3                                                        |
| 107 | NM_005937.2 | MLLT6    | myeloid/lymphoid or mixed-lineage leukemia                                          |
| 108 | NM_005966.3 | NAB1     | NGFI-A binding protein 1                                                            |
| 109 | NM_006007.1 | ZFAND5   | zinc finger, AN1-type domain 5                                                      |
| 110 | NM_006110.1 | CD2BP2   | CD2 (cytoplasmic tail) binding protein 2                                            |
| 111 | NM_006120.2 | HLA-DMA  | major histocompatibility complex, class II, DM alpha                                |
| 112 | NM_006137.6 | CD7      | CD7 molecule                                                                        |
| 113 | NM_006407.3 | ARL6IP5  | ADP ribosylation factor like GTPase 6 interacting protein 5                         |
| 114 | NM_006556.2 | PMVK     | phosphomevalonate kinase                                                            |
| 115 | NM_006564.1 | CXCR6    | chemokine (C-X-C motif) receptor 6                                                  |
| 116 | NM_006759.3 | UGP2     | UDP-glucose pyrophosphorylase 2                                                     |
| 117 | NM_006824.1 | EBNA1BP2 | EBNA1 binding protein 2                                                             |
| 118 | NM_006869.1 | CENTA1   | centaurin, alpha 1                                                                  |
| 119 | NM_007063.2 | TBC1D8   | TBC1 domain family, member 8 (with GRAM domain)                                     |
| 120 | NM_007200.3 | AKAP13   | kinase (PRKA) anchor protein 13                                                     |
| 121 | NM_007254.2 | PNKP     | polynucleotide kinase 3'-phosphatase                                                |
| 122 | NM_012428.1 | SDFR1    | stromal cell derived factor receptor 1                                              |
| 123 | NM_014038.1 | BZW2     | basic leucine zipper and W2 domains 2                                               |
| 124 | NM_014061.3 | MAGEH1   | melanoma antigen family H, 1                                                        |
| 125 | NM_014142.2 | NUDT5    | nudix hydrolase 5                                                                   |
| 126 | NM_014241.2 | PTPLA    | protein tyrosine phosphatase-like (proline instead of catalytic arginine), member a |
| 127 | NM_014380.1 | NGFRAP1  | nerve growth factor receptor (TNFRSF16) associated protein 1                        |
| 128 | NM_014383.1 | ZBTB32   | zinc finger and BTB domain containing 32                                            |
| 129 | NM_014508.2 | APOBEC3C | apolipoprotein B mRNA editing enzyme, catalytic polypeptide-like 3C                 |
| 130 | NM_014583.2 | LMCD1    | LIM and cysteine-rich domains 1                                                     |
| 131 | NM_014661.3 | FAM53B   | family with sequence similarity 53 member B                                         |
| 132 | NM_014832.1 | TBC1D4   | TBC1 domain family, member 4                                                        |
| 133 | NM_015124.2 | GRAMD4   | GRAM domain containing 4                                                            |
| 134 | NM_015150.1 | RFTN1    | raftlin, lipid raft linker 1                                                        |
| 135 | NM_015187.1 | KIAA0746 | KIAA0746 protein                                                                    |
| 136 | NM_015404.1 | DFNB31   | deafness, autosomal recessive 31                                                    |
| 137 | NM_015528.1 | RNF167   | ring finger protein 167                                                             |
| 138 | NM_015559.1 | SETBP1   | SET binding protein 1                                                               |
| 139 | NM_015994.2 | ATP6V1D  | ATPase, H <sup>+</sup> transporting, lysosomal 34kDa, V1 subunit D                  |
| 140 | NM_016053.1 | CCDC53   | coiled-coil domain containing 53                                                    |
| 141 | NM_016086.2 | STYXL1   | serine/threonine/tyrosine interacting-like 1                                        |
| 142 | NM_016459.3 | MZB1     | marginal zone B and B1 cell-specific protein                                        |
| 143 | NM_016497.2 | MRPL51   | mitochondrial ribosomal protein L51                                                 |
| 144 | NM_016633.2 | AHSP     | alpha hemoglobin stabilizing protein                                                |
| 145 | NM_017515.3 | SLC35F2  | solute carrier family 35, member F2                                                 |
| 146 | NM_017654.2 | SAMD9    | sterile alpha motif domain containing 9                                             |
| 147 | NM_017664.2 | ANKRD10  | ankyrin repeat domain 10                                                            |
| 148 | NM_017773.2 | LAX1     | lymphocyte transmembrane adaptor 1                                                  |

|     |             |            |                                                                                     |
|-----|-------------|------------|-------------------------------------------------------------------------------------|
| 149 | NM_017775.2 | TTC19      | tetratricopeptide repeat domain 19                                                  |
| 150 | NM_017791.1 | FLVCR2     | feline leukemia virus subgroup C cellular receptor family, member 2                 |
| 151 | NM_018064.2 | AKIRIN2    | akirin 2                                                                            |
| 152 | NM_018129.1 | PNPO       | pyridoxamine 5'-phosphate oxidase                                                   |
| 153 | NM_018407.4 | LAPTM4B    | lysosomal protein transmembrane 4 beta                                              |
| 154 | NM_018590.3 | CSGALNACT2 | chondroitin sulfate N-acetylgalactosaminyltransferase 2                             |
| 155 | NM_018950.1 | HLA-F      | major histocompatibility complex, class I, F                                        |
| 156 | NM_019026.2 | TMCO1      | transmembrane and coiled-coil domains 1                                             |
| 157 | NM_019043.3 | APBB1IP    | amyloid beta (A4) precursor protein-binding, family B, member 1 interacting protein |
| 158 | NM_020441.2 | CORO1B     | coronin, actin binding protein, 1B                                                  |
| 159 | NM_020531.2 | APMAP      | adipocyte plasma membrane associated protein                                        |
| 160 | NM_021127.1 | PMAIP1     | phorbol-12-myristate-13-acetate-induced protein 1                                   |
| 161 | NM_021270.2 | LAIR2      | leukocyte-associated immunoglobulin-like receptor 2                                 |
| 162 | NM_021983.4 | HLA-DRB4   | major histocompatibility complex, class II, DR beta 4                               |
| 163 | NM_022153.1 | C10ORF54   | chromosome 10 open reading frame 54                                                 |
| 164 | NM_022476.2 | AKTIP      | AKT interacting protein                                                             |
| 165 | NM_022748.9 | TNS3       | tensin 3                                                                            |
| 166 | NM_023927.1 | GRAMD3     | GRAM domain containing 3                                                            |
| 167 | NM_023933.1 | FAM173A    | family with sequence similarity 173, member A                                       |
| 168 | NM_024092.1 | TMEM109    | transmembrane protein 109                                                           |
| 169 | NM_024298.2 | MBOAT7     | membrane bound O-acyltransferase domain containing 7                                |
| 170 | NM_024508.3 | ZBED2      | zinc finger, BED-type containing 2                                                  |
| 171 | NM_024928.3 | OBFC1      | oligonucleotide/oligosaccharide-binding fold containing 1                           |
| 172 | NM_025216.2 | WNT10A     | wingless-type MMTV integration site family member 10A                               |
| 173 | NM_025250.2 | TTYH3      | tweety family member 3                                                              |
| 174 | NM_031243.1 | HNRPA2B1   | heterogeneous nuclear ribonucleoprotein A2/B1                                       |
| 175 | NM_032199.1 | ARID5B     | AT rich interactive domain 5B (MRF1-like)                                           |
| 176 | NM_032704.3 | TUBA1C     | tubulin, alpha 1c                                                                   |
| 177 | NM_032802.2 | SPPL2A     | signal peptide peptidase-like 2A                                                    |
| 178 | NM_033255.2 | EPSTI1     | epithelial stromal interaction 1 (breast)                                           |
| 179 | NM_052941.2 | GBP4       | guanylate binding protein 4                                                         |
| 180 | NM_053041.1 | COMM7      | COMM domain containing 7                                                            |
| 181 | NM_054025.1 | B3GAT1     | beta-1,3-glucuronyltransferase 1 (glucuronosyltransferase P)                        |
| 182 | NM_080816.2 | SIRPG      | signal-regulatory protein gamma                                                     |
| 183 | NM_138371.1 | PCED1B     | PC-esterase domain containing 1B                                                    |
| 184 | NM_138578.1 | BCL2L1     | BCL2-like 1                                                                         |
| 185 | NM_138801.1 | GALM       | galactose mutarotase (aldose 1-epimerase)                                           |
| 186 | NM_138821.1 | PAM        | peptidylglycine alpha-amidating monooxygenase                                       |
| 187 | NM_139266.1 | STAT1      | signal transducer and activator of transcription 1, 91kDa                           |
| 188 | NM_144641.1 | PPM1M      | protein phosphatase 1M (PP2C domain containing)                                     |
| 189 | NM_145169.1 | SFT2D1     | SFT2 domain containing 1                                                            |
| 190 | NM_152405.1 | JMY        | junction-mediating and regulatory protein                                           |
| 191 | NM_152833.2 | C9ORF69    | chromosome 9 open reading frame 69                                                  |
| 192 | NM_153201.1 | HSPA8      | heat shock 70kDa protein 8                                                          |
| 193 | NM_153214.1 | FBLN7      | fibulin 7                                                                           |
| 194 | NM_153332.3 | ERI1       | exoribonuclease 1                                                                   |
| 195 | NM_153609.2 | TMPRSS6    | transmembrane protease, serine 6                                                    |
| 196 | NM_173343.1 | IL1R2      | interleukin 1 receptor, type II                                                     |
| 197 | NM_173798.2 | ZCCHC12    | zinc finger, CCHC domain containing 12                                              |
| 198 | NM_173799.2 | TIGIT      | T cell immunoreceptor with Ig and ITIM domains                                      |
| 199 | NM_173815.3 | FLJ37464   | hypothetical protein FLJ37464                                                       |
| 200 | NM_175852.3 | TXLNA      | taxilin alpha                                                                       |
| 201 | NM_178562.2 | TSPAN33    | tetraspanin 33                                                                      |
| 202 | NM_178834.2 | LAYN       | layilin                                                                             |

|     |             |           |                                                                                   |
|-----|-------------|-----------|-----------------------------------------------------------------------------------|
| 203 | NM_181652.1 | PRDX5     | peroxiredoxin 5                                                                   |
| 204 | NM_183079.1 | PRNP      | prion protein (p27-30)                                                            |
| 205 | NM_194071.2 | CREB3L2   | cAMP responsive element binding protein 3-like 2                                  |
| 206 | NM_198828.1 | LOC375449 | similar to microtubule associated testis specific serine/threonine protein kinase |
| 207 | NR_001298.1 | HLA-DRB6  | major histocompatibility complex, class II, DR beta 6 (pseudogene)                |
| 208 | NR_002733.1 | DGCR5     | DiGeorge syndrome critical region gene 5 (non-protein coding)                     |
| 209 | NR_004845.1 | LOC644936 | actin, beta pseudogene                                                            |
| 210 | NR_024392.1 | HSPBL2    | heat shock 27kDa protein-like 2 pseudogene                                        |
| 211 | XM_925989.1 | LOC642489 | similar to FK506-binding protein 1A                                               |
| 212 | XM_926168.1 | LOC643025 | similar to Probable phosphoglycerate mutase 4                                     |
| 213 | XM_929420.1 | LOC653377 | similar to family with sequence similarity 36, member A                           |
| 214 | XM_939115.1 | MGC4677   | hypothetical protein MGC4677                                                      |
| 215 | XM_939906.1 | LOC650815 | similar to T-cell receptor alpha chain V region CTL-L17 precursor                 |
| 216 | XR_016557.2 | LOC391075 | misc_RNA                                                                          |

**Table S2**

List of the pathways significantly ( $p < 0.05$ ) enriched among the 216 genes upregulated in Treg CT OX40+ (www.reactome.org).

| Pathway name                                                                 | Entities found | Entities total | Entities ratio | Entities pValue |
|------------------------------------------------------------------------------|----------------|----------------|----------------|-----------------|
| Interleukin-4 and 13 signaling                                               | 18             | 212            | 0.16           | 2.08E-7         |
| Cytokine Signaling in Immune System                                          | 44             | 1006           | 0.075          | 2.45E-7         |
| Signaling by Interleukins                                                    | 31             | 688            | 0.051          | 1.01E-5         |
| Fibronectin matrix formation                                                 | 3              | 7              | 0.001          | 3.58E-4         |
| Interferon Signaling                                                         | 15             | 292            | 0.022          | 5.89E-4         |
| Immune System                                                                | 71             | 2616           | 0.195          | 9.66E-4         |
| Transferrin endocytosis and recycling                                        | 5              | 39             | 0.003          | 1.01E-3         |
| Neutrophil degranulation                                                     | 20             | 480            | 0.036          | 1.05E-3         |
| <i>Glycolysis</i>                                                            | 6              | 63             | 0.005          | 1.48E-3         |
| MHC class II antigen presentation                                            | 9              | 142            | 0.011          | 1.86E-3         |
| Insulin receptor recycling                                                   | 4              | 28             | 0.002          | 2.2E-3          |
| Formation of the cornified envelope                                          | 8              | 130            | 0.01           | 3.9E-3          |
| Glucose metabolism                                                           | 8              | 131            | 0.01           | 4.08E-3         |
| RHO GTPases activate IQGAPs                                                  | 4              | 35             | 0.003          | 4.85E-3         |
| Iron uptake and transport                                                    | 6              | 83             | 0.006          | 5.64E-3         |
| Activation of NOXA and translocation to mitochondria                         | 2              | 6              | 0              | 6.08E-3         |
| Interferon alpha/beta signaling                                              | 8              | 141            | 0.011          | 6.26E-3         |
| BH3-only proteins associate with and inactivate anti-apoptotic BCL-2 members | 2              | 8              | 0.001          | 1.05E-2         |
| Cell surface interactions at the vascular wall                               | 11             | 256            | 0.019          | 1.11E-2         |
| Semaphorin interactions                                                      | 5              | 73             | 0.005          | 1.38E-2         |
| Intrinsic pathways for apoptosis                                             | 4              | 49             | 0.004          | 1.52E-2         |
| Nef Mediated CD4 Down-regulation                                             | 2              | 10             | 0.001          | 1.61E-2         |
| Aflatoxin activation and detoxification                                      | 4              | 50             | 0.004          | 1.62E-2         |
| Sema4D induced cell migration and growth-cone collapse                       | 3              | 28             | 0.002          | 1.71E-2         |
| Regulation of IFNA signaling                                                 | 3              | 28             | 0.002          | 1.71E-2         |
| The role of Nef in HIV-1 replication and disease pathogenesis                | 3              | 29             | 0.002          | 1.87E-2         |
| TNFa binds their physiological receptors                                     | 3              | 30             | 0.002          | 2.05E-2         |
| Inteferon gamma signaling                                                    | 8              | 186            | 0.013          | 2.11E-2         |
| The role of GTSE1 in G2/M progression after G2 checkpoint                    | 5              | 82             | 0.006          | 2.16E-2         |
| AUF (hnRNP D0) binds and destabilizes mRNA                                   | 4              | 56             | 0.004          | 2.34E-2         |
| Sema4D in semaphorin signaling                                               | 3              | 33             | 0.002          | 2.61E-2         |
| Interleukin-12 family signaling                                              | 2              | 13             | 0.001          | 2.62E-2         |
| Translocation of GLUT4 to the plasma membrane                                | 5              | 87             | 0.006          | 2.69E-2         |
| Activation of BH3-only proteins                                              | 3              | 36             | 0.003          | 3.26E-2         |
| Regulation of IFNG signaling                                                 | 2              | 16             | 0.001          | 3.82E-2         |
| COPI-mediated anterograde transport                                          | 5              | 100            | 0.007          | 4.45E-2         |
| <i>Activation of gene expression by SREBF (SREBP)</i>                        | 4              | 70             | 0.005          | 4.66E-2         |
| Translocation of ZAP-70 to Immunological synapse                             | 3              | 42             | 0.003          | 4.76E-2         |
